# Supplementary material for: Coherent analysis of disordered mesoporous adsorbents using small angle X-ray scattering and physisorption experiments
Source: Royal Society of Chemistry journal article supplement (doi:10.1039/c3cp55072a), 2014-01-01
Supplement: c3cp55072a1.pdf [file c3cp55072a1.pdf]

### Supporting Information:

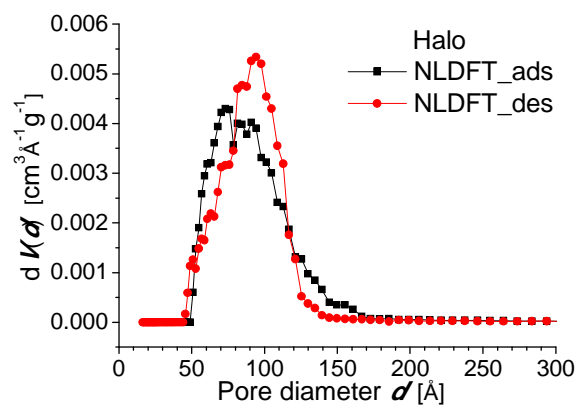

**Fig. S1** Pore size distributions of the core-shell Halo particles derived from the adsorption and desorption branch of the nitrogen physisorption isotherm by means of the NLDFT method with a cylindrical pore model for the system nitrogen (77 K)/silica.
